# Supplementary material for: Does non-invasive ventilation change metabolic markers in children with obstructive sleep apnoea? A systematic review and meta-analysis study protocol
Source: PubMed Central journal article supplement — BMJ Open. 2020 Aug 23;10(8):e039655. doi: 10.1136/bmjopen-2020-039655 (PMC7445331; doi:10.1136/bmjopen-2020-039655), 2020-08-23
Supplement: bmjopen-2020-039655.draft_revisions.pdf [file bmjopen-2020-039655.draft_revisions.pdf]

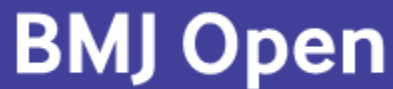

BMJ Open is committed to open peer review. As part of this commitment we make the peer review history of every article we publish publicly available.

When an article is published we post the peer reviewers' comments and the authors' responses online. We also post the versions of the paper that were used during peer review. These are the versions that the peer review comments apply to.

The versions of the paper that follow are the versions that were submitted during the peer review process. They are not the versions of record or the final published versions. They should not be cited or distributed as the published version of this manuscript.

BMJ Open is an open access journal and the full, final, typeset and author-corrected version of record of the manuscript is available on our site with no access controls, subscription charges or pay-per-view fees (<http://bmjopen.bmj.com>).

If you have any questions on BMJ Open's open peer review process please email [info.bmjopen@bmj.com](mailto:info.bmjopen@bmj.com)

# BMJ Open

## Does non-invasive ventilation change metabolic markers in children with obstructive sleep apnea? A Systematic Review

|                               |                                                                                                                                                                                                                                                                                                                                                                                                                                                                                                                                                                         |
|-------------------------------|-------------------------------------------------------------------------------------------------------------------------------------------------------------------------------------------------------------------------------------------------------------------------------------------------------------------------------------------------------------------------------------------------------------------------------------------------------------------------------------------------------------------------------------------------------------------------|
| Journal:                      | <i>BMJ Open</i>                                                                                                                                                                                                                                                                                                                                                                                                                                                                                                                                                         |
| Manuscript ID                 | bmjopen-2020-039655                                                                                                                                                                                                                                                                                                                                                                                                                                                                                                                                                     |
| Article Type:                 | Protocol                                                                                                                                                                                                                                                                                                                                                                                                                                                                                                                                                                |
| Date Submitted by the Author: | 21-Apr-2020                                                                                                                                                                                                                                                                                                                                                                                                                                                                                                                                                             |
| Complete List of Authors:     | Gerdung, Christopher; University of Alberta Faculty of Medicine and Dentistry, Pediatrics; Alberta Health Services, Pediatrics<br>Rodriguez-Lopez, Sara; University of Alberta, ;<br>Palkowski, Stefan; Stollery Children's Hospital; University of Alberta<br>Keto-Lambert, Diana; University of Alberta, Alberta Strategy for Patient-Oriented Research (SPOR) Knowledge Translation Platform<br>Sebastianski, Meghan; University of Alberta Faculty of Medicine and Dentistry Department of Pediatrics ,<br>Castro Codesal, Maria; University of Alberta, Pediatrics |
| Keywords:                     | Paediatric thoracic medicine < PAEDIATRICS, SLEEP MEDICINE, Paediatric endocrinology < PAEDIATRICS, Paediatric cardiology < PAEDIATRICS, Other metabolic, e.g. iron, porphyria < DIABETES & ENDOCRINOLOGY                                                                                                                                                                                                                                                                                                                                                               |
|                               |                                                                                                                                                                                                                                                                                                                                                                                                                                                                                                                                                                         |

SCHOLARONE™  
Manuscripts

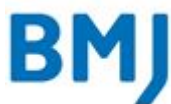

I, the Submitting Author has the right to grant and does grant on behalf of all authors of the Work (as defined in the below author licence), an exclusive licence and/or a non-exclusive licence for contributions from authors who are: i) UK Crown employees; ii) where BMJ has agreed a CC-BY licence shall apply, and/or iii) in accordance with the terms applicable for US Federal Government officers or employees acting as part of their official duties; on a worldwide, perpetual, irrevocable, royalty-free basis to BMJ Publishing Group Ltd ("BMJ") its licensees and where the relevant Journal is co-owned by BMJ to the co-owners of the Journal, to publish the Work in this journal and any other BMJ products and to exploit all rights, as set out in our [licence](#).

The Submitting Author accepts and understands that any supply made under these terms is made by BMJ to the Submitting Author unless you are acting as an employee on behalf of your employer or a postgraduate student of an affiliated institution which is paying any applicable article publishing charge ("APC") for Open Access articles. Where the Submitting Author wishes to make the Work available on an Open Access basis (and intends to pay the relevant APC), the terms of reuse of such Open Access shall be governed by a Creative Commons licence – details of these licences and which [Creative Commons](#) licence will apply to this Work are set out in our licence referred to above.

Other than as permitted in any relevant BMJ Author's Self Archiving Policies, I confirm this Work has not been accepted for publication elsewhere, is not being considered for publication elsewhere and does not duplicate material already published. I confirm all authors consent to publication of this Work and authorise the granting of this licence.

## Title

Does non-invasive ventilation change metabolic markers in children with obstructive sleep apnea? A Systematic Review

## Authors:

Christopher A Gerdung<sup>1,2</sup>, Sara Rodriguez-Lopez<sup>1,2</sup>, Stefan Palkowski<sup>1,2</sup>, Diana Keto-Lambert<sup>3</sup>, Meghan Sebastianski<sup>3</sup>, Maria L Castro-Codesal<sup>1,2</sup>

## Affiliations:

1: Department of Pediatrics, University of Alberta, Edmonton, Alberta, Canada

2: Stollery Children's Hospital, Alberta Health Services, Edmonton, Alberta, Canada

3: Alberta Strategy for Patient-Oriented Research (SPOR) SUPPORT Unit Knowledge Translation Platform, University of Alberta, Edmonton, Alberta, Canada.

## Abstract

### Introduction

Obstructive Sleep Apnea (OSA) is not only common within pediatrics but is associated with critical childhood metabolic morbidity such as obesity, cardiovascular disease and glucose tolerance impairment. Increasing evidence suggests an association between childhood OSA and metabolic syndrome such as markers of cardiovascular disease, systemic hypertension, glucose intolerance, and increased lipid profile. Recent studies have targeted changes in metabolic markers in children using NIV but no systematic reviews are available to summarize this emerging evidence. The purpose of this systematic review is to provide systematic synthesis of the evidence on the effect of NIV use on metabolic markers in children with OSA.

### Methods and Analysis:

A systematic search of electronic databases and grey literature will include will include pediatric interventional studies (RCTs, cohort studies) with and without a comparison group. Two reviewers will independently undertake the two step process of title/abstract and full text screening. Data will be extracted and assessed, with aggregate data being reported. When the data allow, meta-analysis will be performed.

### Ethics and Dissemination:

There are no ethical concerns with this systematic review, as data has previously been published. This review will inform clinicians taking care of children with OSA and obesity/metabolic syndrome about the potential effects of NIV therapies on metabolic markers, and has the potential to change the approach to childhood OSA and obesity. Results of this systematic review will be submitted for dissemination in abstract and manuscript form.

## Strengths and Limitations of this Study

- We will use comprehensive systematic review and meta-analysis methods to summarize the evidence on the efficacy of a respiratory intervention for an increasing health problem in children worldwide: obesity and metabolic syndrome.
- Methodological experts and pediatric clinical specialists have been consulted to ensure that our search strategy captures all potential metabolic markers that might be impacted by NIV.
- We will attempt a meta-analysis when there is enough homogeneity among populations and measured outcomes.
- Limited appraisal of the grey literature will be performed.

## Introduction

Obstructive sleep apnea (OSA) is common in children with an estimated prevalence of 5.7% (1). OSA contributes to childhood morbidity, including impaired cognition, neurodevelopmental delay, cardio-metabolic dysfunction, and reduced quality of life (2). The metabolic consequences of OSA are well known among adult populations, with a clearly demonstrated association between OSA and metabolic syndrome, including systemic hypertension, cardiovascular risk, dyslipidemia, glucose control impairment and systemic inflammation (3, 4). The literature examining the association between metabolic syndrome in children has shown a similar relationship with an emerging body of the literature demonstrating a greater risk of hypertension, dyslipidemia and glucose control in obese children and youths with OSA (5-8).

The first line therapy for the treatment of OSA in children is adenotonsillectomy (2, 9). In both obese and non-obese children, surgical intervention can improve cardio-respiratory parameters in sleep studies including apnea hypopnea Index (AHI) and oxygen saturation values. Surgical management has also been shown to have positive effects on systemic inflammation and dyslipidemia (10-12). However, residual symptoms of OSA after adenotonsillectomy have been shown to be present in up to half of children, which is particularly true in children with obesity (13-15). Given the persistence of OSA after surgery, the metabolic consequences are likely to persist. Non-invasive ventilation, including continuous positive airway pressure (CPAP) and bilevel positive airway pressure (BPAP), is the recommended therapy for children with OSA who are not surgical candidates, or for children with persistent OSA post-surgery. Initiation of NIV has been shown to have significant effects on nocturnal symptoms of OSA and daytime outcomes such as daytime sleepiness, attention, academic performance, and quality of life (16-20). While previous systematic reviews and meta-analysis have summarized the impact of NIV in metabolic markers in the adult population, including hypertension cardiovascular outcomes, glucose control, lipid profile, systemic inflammation and even mortality (19, 21-29), similar systematic reviews are not available in pediatric populations. The purpose of this systematic review is to provide a rigorous overview of the evidence describing the effect of NIV use on metabolic markers in children with OSA.

## Methods and Analysis

### Study design

The methodology of this systematic review and meta-analysis follows the recommendations made in the “Preferred Reporting Items for Systematic Reviews and Meta-Analyses protocols (PRISMA-P) 2015 statement ” (30). Approval from the NIHR PROSPERO registry is pending.

## Search strategy

An information specialist, systematic review methodologist and clinical experts in pediatric respiratory and sleep medicine and pediatric metabolic syndrome have established a collaborative team to develop a comprehensive search strategy and determined the appropriate information sources. The search strategy includes terms for “NIV” used in a previously published scoping review, a published filter for pediatric populations and addresses the following key concepts: effects on oxidative stress and markers of systemic inflammation, cardiovascular outcomes, changes in weight/body mass index, lipid profile, liver enzymes, glucose control and markers of insulin resistance, renal function and other metabolic markers (See Appendix A) (31). Information sources will include Ovid Medline, Ovid Embase, CINAHL via EbscoHOST, Wiley Cochrane Library (including the Cochrane Database of Systematic Reviews, the Cochrane Central Register of Controlled Trials, the Database of Abstracts of Reviews of Effects, the Health Technology Assessment Database, and the NHS Economic Evaluation Database) and PROQUEST Theses and Dissertations. No language restrictions will be applied to the search strategy. Letters, editorials, commentaries and non-intervention studies will be excluded. Reference lists of all studies included in this systematic review will be scanned to identify further relevant studies not detected by the search strategy. Published abstracts from 2018-2019 from the following conferences will be screened: American Thoracic Society Conference, Canadian Thoracic Society Conference, CHEST Congress, European Respiratory Society, Sleep Meeting. The search of the above information sources is planned to occur on April 30, 2020.

## Eligibility criteria

**Types of participants/population:** Studies including children (newborn to age 18 years) will be included. Studies across ages with disaggregated pediatric data will also be included. Eligible studies must pertain to children with OSA or other sleep-related breathing disorders as defined in the International Classification of Sleep Disorders, including obstructive sleep apnea and sleep-related hypoventilation

**Types of Interventions:** Included studies must contain information on NIV (CPAP or BPAP) use. We will include studies irrespective of the length of NIV usage.

**Type of Outcomes:** Eligible studies must include data related to metabolic markers, with no outcome restrictions. This includes, but is not limited to: effects on oxidative stress and markers of systemic inflammation, cardiovascular outcomes, changes in weight/body mass index, lipid profile, liver enzymes, glucose control and markers of insulin resistance, renal function and other metabolic markers.

**Types of Studies:** Interventional studies will be considered for inclusion including randomized and non-randomized clinical trials (RCTs and non-RCTs), controlled before-after studies. No other study designs will be considered for inclusion.

**Exclusion:** Qualitative and mixed methods research will be excluded, as will case series, case reports, and non-specified grey literature.

## Study records

**Data management:** Records from searches will be imported into an EndNote library (Endnote X9, Clarivate Analytics) and duplicates will be removed. The library will be duplicated for independent screening.

**Selection process:** Two independent reviewers (MCC, CAG) will screen titles and abstracts of retrieved articles for eligibility based on the inclusion criteria. Full text will be retrieved for all potentially relevant articles, which will be reviewed independently by the two reviewers, and studies that meet the eligibility criteria will be included in the review. Discrepancies between the reviewers will be resolved through discussion. Reasons for exclusion will be recorded at the full-text review level.

**Data collection process:** Data extraction will be completed by one reviewer using a pre-designed standardized form and entered into RedCap Database (32, 33). Data extraction will be verified by a second reviewer for a sample of 20% of the studies with acceptance if agreement in at least 80% of the data. Duplicate data from the same data set published in different manuscripts will be removed. Data Extraction is expected to be complete by October 1, 2020.

**Data synthesis:** Once the information has been extracted, we will present findings including the numerical analysis of the number, publication type, publication year and country of publication of the studies included in the review. We will also present a narrative description of the study design, participant characteristics, sample size, NIV type, control group description, outcomes measures, and follow up duration. We will use this information to establish subcategories of studies which may include groupings based on age (i.e., infants, children, and adolescents), intervention type (i.e., CPAP, bi-level,) and outcomes (e.g. oxidative stress, obesity, dyslipidemia, liver disease, glucose intolerance, cardiovascular, renal and other metabolic diseases).

**Quality assessment and risk of bias:** Risk of bias will be assessed by two independent reviewers (MCC, CAG) specific to the study methodology. Tools will include the Quality Assessment Tool (34) and Cochrane risk of bias tool (35). Discrepancies in decisions will be resolved through discussion.

The reviewers will also use the Grading of Recommendations, Assessment, Development and Evaluations (GRADE) to assess the evidence at the outcome level (36). This will include assessing for risk of bias, imprecision, inconsistency, indirectness and publication bias.

**Meta-analysis**

Meta-analysis will be attempted for outcomes with enough homogeneity among the study populations. Homogeneity criteria will include an AHI <5 events/hour to define mild obstructive sleep apnea, 5-10 events/h for moderate and >10 for severe sleep disordered breathing as per the American Academy of Sleep Medicine (AASM) (37, 38). In addition, nocturnal hypoxemia will be defined by sleep time with oxygen saturations below 90% over 5% and nocturnal hypoventilation by over 25% sleep time carbon dioxide levels above 50 mmHg (39). The information will be subcategorized to include grouping based on outcome (changes in the same metabolic marker). For non-randomized studies, we will combine effect estimates from studies adjusted by confounding rather than raw data if available. RCTs will be analyzed separately if available. Risk of bias will be considered and explanations for heterogeneity will be pursued including publication bias. Graphics of pooled data (i.e. forest plots) will be provided. Most outcome data are expected to be continuous.

**Ethics and Dissemination**

There are no ethical concerns with this systematic review, as data has previously been published. This review will inform clinicians taking care of children with OSA and obesity/metabolic syndrome about the potential effects of NIV therapies on metabolic markers and help plan for necessary assessment of this

group of children in the clinical practice. This information has the potential to change the approach to childhood OSA and obesity and therefore impact future clinical guidelines at national and international level. Results of this systematic review will be submitted for dissemination in abstract and manuscript form at multiple levels to target general pediatricians and pediatric specialists involved in the care of these patients including pediatric respiratory and sleep specialists, endocrinologists, cardiologists and nephrologists. The results of this systematic review will be of interest for general audience, which can be reached through infographics, videos and TED talks to be distributed through social media.

## Authors Contributions

MCC, CAG and SRL were involved in idea generation of this study. MCC, CAG, SRL, SP, DKL and MS were involved in study design and protocol development. MS and DKL developed the search strategies and performed literature reviews. MCC and CAG were involved with review of literature for inclusion into the study.

## Funding Statement

This work was supported by the Alberta Strategy for Patient-Oriented Research (SPOR) SUPPORT Unit Knowledge Translation Platform, which is funded by Alberta Innovates and the Canadian Institutes of Health Research.

## Competing Interests Statement

There are no competing interests to declare.

## Word Count: (4000 max)

Appendix A (Search Strategies)

NIV

As per (31, 40)

Children

As per (31, 40)

SDB

Sleep Apnea, Obstructive Sleep Apnea, OSA, Central Sleep Apnea, CSA, Primary Central Sleep Apnea, Primary Sleep Apnea of Infancy, Primary Central Sleep Apnea of Prematurity, Treatment-Emergent Central Sleep Apnea, Obesity Hypoventilation Syndrome, Hypoventilation, Central Hypoventilation, Pickwickian Syndrome, Congenital Central Hypoventilation Syndrome, CCHS, Congenital Central Alveolar Hypoventilation Syndrome, Late onset Central Hypoventilation with Hypothalamic Dysfunction, Idiopathic Central Alveolar Hypoventilation, Central Alveolar Hypoventilation, Central Hypoventilation, Sleep related hypoventilation, Sleep related hypoxemia, Snoring, Primary Snoring, Catathrenia

Metabolic Markers

Oxidative stress: Oxidative Stress, inflammation, metabolism, metabolic, CRP, interleukin-6 (IL-6) and 8 (IL), tumor necrosis factor alpha (TNFa), cytokines, adipokines, cortisol, a-amylase, sympathetic dysfunction, endothelial dysfunction, atherosclerosis, arterial stiffness, endothelial nitric oxide synthase (eNOS), nitric oxide (NO), cyclooxygenase (Cox)-1, Cox-2, thromboxane A2, prostacyclin. Circulating progenitor cells (CPCs), 8-isoprostanes, circulating cell-derived MPS: PMPs, LMPs, EMPs, adiponectin, LTB4, TNFR-1, IFN, plasminogen activator inhibitor-1, monocyte chemoattractant protein-1, matrix metalloproteinase-9, apelin C, osteocrin, adropin, TREM-1, pentraxin 3, BNP, MRP 8/14

Obesity: weight, weight gain, weight loss, weight management, obese, obesity, overweight, body mass index, BMI, growth, growth acceleration, anthropometric, leptin, grehlin,

Dyslipidemia: Dislipidemia, lipid, elevated lipid, Triglycerides, cholesterol, Total cholesterol, high-density lipoprotein cholesterol, HDL-C, HDL, apoB, lipoprotein

Liver disease: liver enzymes, Aspartate transaminase, AST, alanine transaminase, ALT, liver disease, nonalcoholic fatty liver disease, NAFLD

Glucose intolerance: glucose, elevated glucose, glucose metabolism, glycemia, hyperglycemia, insulin, elevated insulin, insulin resistance, diabetes, diabetes mellitus, adiponectin, adiposity, HOMA-index (homeostasis model assessment), HbA1c, fasting plasma glucose (FPG), fasting serum glucose, fasting glucose, fasting plasma insulin (FPI), OGTT, oral glucose tolerance test, glucose tolerance test, acute insulin response to glucose, acute insulin response (FSIGT), C-peptide, glucagon

Cardiovascular: heart function, cardiovascular disease, cardiovascular diseases, Blood pressure, systolic blood pressure (SBP), diastolic blood pressure (DBP), hypertension, hypertensive, high blood pressure, High blood pressures, elevated blood pressure, elevated blood pressures, prehypertension, 24-hour ambulatory blood pressure monitoring (ABPM), nocturnal blood pressure dipping, nocturnal dipping, blood pressure variability, nocturnal blood pressure variability, Left ventricular hypertrophy, LVH, right ventricular hypertrophy, RVH, ventricular hypertrophy, echocardiogram, systolic function impairment, diastolic function impairment, cardiac events, cardiac event, cardiac events, cardiac, heart, hearts,

coronary disease, coronary diseases, sudden cardiac death, sudden cardiac deaths, cardiac sudden death, sudden cardiac deaths, sudden cardiac arrest, sudden cardiac arrests, cardiac arrest, cardiac arrests, heart failure, right heart failure, acute right heart failure, chronic right heart failure,

Renal involvement: Proteinuria, Microalbuminuria, Focal segmental glomerulosclerosis (FSGS), kidney, renal

Other: Metabolic disease,

## Appendix B: Published Abstracts from Prominent Conferences and Thesis Dissertations

American Thoracic Society

Canadian Respiratory Conference

CHEST

European Respiratory Society International Congress

Sleep Meeting

World Sleep Congress

Thesisdissertations.org

References:

1. Marcus CL, Brooks LJ, Draper KA, Gozal D, Halbower AC, Jones J, et al. Diagnosis and management of childhood obstructive sleep apnea syndrome. *Pediatrics*. 2012;130(3):e714-55.

2. Marcus CL, Moore RH, Rosen CL, Giordani B, Garetz SL, Taylor HG, et al. A randomized trial of adenotonsillectomy for childhood sleep apnea. *N Engl J Med*. 2013;368(25):2366-76.

3. Kong DL, Qin Z, Wang W, Pan Y, Kang J, Pang J. Association between obstructive sleep apnea and metabolic syndrome: a meta-analysis. *Clin Invest Med*. 2016;39(5):E161-E72.

4. Xu S, Wan Y, Xu M, Ming J, Xing Y, An F, et al. The association between obstructive sleep apnea and metabolic syndrome: a systematic review and meta-analysis. *BMC Pulmonary Medicine*. 2015;15:105.

5. Patinkin ZW, Feinn R, Santos M. Metabolic Consequences of Obstructive Sleep Apnea in Adolescents with Obesity: A Systematic Literature Review and Meta-Analysis. *Child Obes*. 2017;13(2):102-10.

6. Koren D, Gozal D, Philby MF, Bhattacharjee R, Kheirandish-Gozal L. Impact of obstructive sleep apnoea on insulin resistance in nonobese and obese children. *Eur Respir J*. 2016;47(4):1152-61.

7. Redline S, Storfer-Isser A, Rosen CL, Johnson NL, Kirchner HL, Emancipator J, et al. Association between metabolic syndrome and sleep-disordered breathing in adolescents. *Am J Respir Crit Care Med*. 2007;176(4):401-8.

8. Verhulst SL, Schrauwen N, Haentjens D, Rooman RP, Van Gaal L, De Backer WA, et al. Sleep-disordered breathing and the metabolic syndrome in overweight and obese children and adolescents. *J Pediatr*. 2007;150(6):608-12.

9. Alsubie HS, BaHammam AS. Obstructive Sleep Apnoea: Children are not little Adults. *Paediatr Respir Rev*. 2017;21:72-9.

10. Kheirandish-Gozal L, Gileles-Hillel A, Alonso-Alvarez ML, Peris E, Bhattacharjee R, Teran-Santos J, et al. Effects of adenotonsillectomy on plasma inflammatory biomarkers in obese children with obstructive sleep apnea: A community-based study. *Int J Obes (Lond)*. 2015;39(7):1094-100.

11. Gozal D, Capdevila OS, Kheirandish-Gozal L. Metabolic alterations and systemic inflammation in obstructive sleep apnea among nonobese and obese prepubertal children. *Am J Respir Crit Care Med*. 2008;177(10):1142-9.

12. Waters KA, Sitha S, O'Brien L M, Bibby S, de Torres C, Vella S, et al. Follow-up on metabolic markers in children treated for obstructive sleep apnea. *Am J Respir Crit Care Med*. 2006;174(4):455-60.

13. Scheffler P, Wolter NE, Narang I, Amin R, Holler T, Ishman SL, et al. Surgery for Obstructive Sleep Apnea in Obese Children: Literature Review and Meta-analysis. *Otolaryngol Head Neck Surg*. 2019;160(6):985-92.

14. Kang KT, Koltai PJ, Lee CH, Lin MT, Hsu WC. Lingual Tonsillectomy for Treatment of Pediatric Obstructive Sleep Apnea: A Meta-analysis. *JAMA Otolaryngol Head Neck Surg*. 2017;143(6):561-8.

15. Rivero A, Durr M. Lingual Tonsillectomy for Pediatric Persistent Obstructive Sleep Apnea: A Systematic Review and Meta-analysis. *Otolaryngol Head Neck Surg*. 2017;157(6):940-7.

16. Beebe DW, Byars KC. Adolescents with obstructive sleep apnea adhere poorly to positive airway pressure (PAP), but PAP users show improved attention and school performance. *PLoS ONE*. 2011;6(3):e16924.

17. Marcus CL, Rosen G, Ward SL, Halbower AC, Sterni L, Lutz J, et al. Adherence to and effectiveness of positive airway pressure therapy in children with obstructive sleep apnea. *Pediatrics*. 2006;117(3):e442-51.

18. Marcus CL, Radcliffe J, Konstantinopoulou S, Beck SE, Cornaglia MA, Traylor J, et al. Effects of positive airway pressure therapy on neurobehavioral outcomes in children with obstructive sleep apnea. *American Journal of Respiratory & Critical Care Medicine*. 2012;185(9):998-1003.
19. Patil SP, Ayappa IA, Caples SM, Kimoff RJ, Patel SR, Harrod CG. Treatment of Adult Obstructive Sleep Apnea With Positive Airway Pressure: An American Academy of Sleep Medicine Systematic Review, Meta-Analysis, and GRADE Assessment. *J Clin Sleep Med*. 2019;15(2):301-34.
20. Uong EC, Epperson M, Bathon SA, Jeffe DB. Adherence to nasal positive airway pressure therapy among school-aged children and adolescents with obstructive sleep apnea syndrome. *Pediatrics*. 2007;120(5):e1203-11.
21. Martinez-Garcia MA, Campos-Rodriguez F, Javaheri S, Gozal D. Pro: continuous positive airway pressure and cardiovascular prevention. *European Respiratory Journal*. 2018;51(5):05.
22. Masa JF, Corral-Penafiel J. Should use of 4 hours continuous positive airway pressure per night be considered acceptable compliance? *Eur Respir J*. 2014;44(5):1119-20.
23. Weaver TE, Maislin G, Dinges DF, Bloxham T, George CF, Greenberg H, et al. Relationship between hours of CPAP use and achieving normal levels of sleepiness and daily functioning. *Sleep*. 2007;30(6):711-9.
24. Wolf J, Narkiewicz K. Optimizing the Management of Uncontrolled/Resistant Hypertension. The Importance of Sleep Apnoea Syndrome. *Curr Vasc Pharmacol*. 2017;16(1):44-53.
25. Lei Q, Lv Y, Li K, Ma L, Du G, Xiang Y, et al. Effects of continuous positive airway pressure on blood pressure in patients with resistant hypertension and obstructive sleep apnea: a systematic review and meta-analysis of six randomized controlled trials. *J Bras Pneumol*. 2017;43(5):373-9.
26. Zhu B, Ma C, Chaiard J, Shi C. Effect of continuous positive airway pressure on glucose metabolism in adults with type 2 diabetes: a systematic review and meta-analysis of randomized controlled trials. *Sleep & Breathing*. 2018;22(2):287-95.
27. McEvoy RD, Kohler M. Con: continuous positive airway pressure and cardiovascular prevention. *European Respiratory Journal*. 2018;51(5):05.
28. Lee CP, Kushida CA, Abisheganaden JA. Epidemiological and pathophysiological evidence supporting links between obstructive sleep apnoea and Type 2 diabetes mellitus. *Singapore Medical Journal*. 2019;60(2):54-6.
29. Labarca G, Reyes T, Jorquera J, Dreyse J, Drake L. CPAP in patients with obstructive sleep apnea and type 2 diabetes mellitus: Systematic review and meta-analysis. *Clin Respir J*. 2018;12(8):2361-8.
30. Moher D, Shamseer L, Clarke M, Ghersi D, Liberati A, Petticrew M, et al. Preferred reporting items for systematic review and meta-analysis protocols (PRISMA-P) 2015 statement. *Syst Rev*. 2015;4:1.
31. Castro Codesal ML, Featherstone R, Martinez Carrasco C, Katz SL, Chan EY, Bendiak GN, et al. Long-term non-invasive ventilation therapies in children: a scoping review protocol. *BMJ Open*. 2015;5(8):e008697.
32. Harris PA, Taylor R, Minor BL, Elliott V, Fernandez M, O'Neal L, et al. The REDCap consortium: Building an international community of software platform partners. *J Biomed Inform*. 2019;95:103208.
33. Harris PA, Taylor R, Thielke R, Payne J, Gonzalez N, Conde JG. Research electronic data capture (REDCap)--a metadata-driven methodology and workflow process for providing translational research informatics support. *J Biomed Inform*. 2009;42(2):377-81.
34. Thomas H. Quality assessment tool for uantitative studies. Effective Public Health Practicde Project. 2003 [Available from: <https://www.ehpdp.ca/quality-assessment-tool-for-quantitative-studies/>].
35. Higgins JPT, Altman DG, Gøtzsche PC, Jüni P, Moher D, Oxman AD, et al. The Cochrane Collaboration's tool for assessing risk of bias in randomised trials. *Bmj*. 2011;343:d5928.
36. Guyatt G, Oxman AD, Akl EA, Kunz R, Vist G, Brozek J, et al. GRADE guidelines: 1. Introduction- GRADE evidence profiles and summary of findings tables. *J Clin Epidemiol*. 2011;64(4):383-94.

37. Dehlink E, Tan HL. Update on paediatric obstructive sleep apnoea. J Thorac Dis. 2016;8(2):224-35.

38. DeHaan KL, Seton C, Fitzgerald DA, Waters KA, MacLean JE. Polysomnography for the diagnosis of sleep disordered breathing in children under 2 years of age. Pediatr Pulmonol. 2015;50(12):1346-53.

39. Berry RB, Albertario CL, M HS. The AASM Manual for the Scoring of Sleep and Associated Events: Rules, terminology and Technical Specifications. Version 2.5. Darien, IL: American Academy of Sleep Medicine; 2018.

40. Castro-Codesal ML, Dehaan K, Bedi PK, Bendiak GN, Schmalz L, Katz SL, et al. Longitudinal changes in clinical characteristics and outcomes for children using long-term non-invasive ventilation. PLoS ONE. 2018;13(1):e0192111.

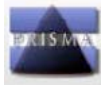

# PRISMA 2009 Checklist

| Section/topic                      | #  | Checklist item                                                                                                                                                                                                                                                                                              | Reported on page # |
|------------------------------------|----|-------------------------------------------------------------------------------------------------------------------------------------------------------------------------------------------------------------------------------------------------------------------------------------------------------------|--------------------|
| <b>TITLE</b>                       |    |                                                                                                                                                                                                                                                                                                             |                    |
| Title                              | 1  | Identify the report as a systematic review, meta-analysis, or both.                                                                                                                                                                                                                                         | 1                  |
| <b>ABSTRACT</b>                    |    |                                                                                                                                                                                                                                                                                                             |                    |
| Structured summary                 | 2  | Provide a structured summary including, as applicable: background; objectives; data sources; study eligibility criteria, participants, and interventions; study appraisal and synthesis methods; results; limitations; conclusions and implications of key findings; systematic review registration number. | 1                  |
| <b>INTRODUCTION</b>                |    |                                                                                                                                                                                                                                                                                                             |                    |
| Rationale                          | 3  | Describe the rationale for the review in the context of what is already known.                                                                                                                                                                                                                              | 2                  |
| Objectives                         | 4  | Provide an explicit statement of questions being addressed with reference to participants, interventions, comparisons, outcomes, and study design (PICOS).                                                                                                                                                  | 2                  |
| <b>METHODS</b>                     |    |                                                                                                                                                                                                                                                                                                             |                    |
| Protocol and registration          | 5  | Indicate if a review protocol exists, if and where it can be accessed (e.g., Web address), and, if available, provide registration information including registration number.                                                                                                                               | 2                  |
| Eligibility criteria               | 6  | Specify study characteristics (e.g., PICOS, length of follow-up) and report characteristics (e.g., years considered, language, publication status) used as criteria for eligibility, giving rationale.                                                                                                      | 3                  |
| Information sources                | 7  | Describe all information sources (e.g., databases with dates of coverage, contact with study authors to identify additional studies) in the search and date last searched.                                                                                                                                  | 3                  |
| Search                             | 8  | Present full electronic search strategy for at least one database, including any limits used, such that it could be repeated.                                                                                                                                                                               | 3                  |
| Study selection                    | 9  | State the process for selecting studies (i.e., screening, eligibility, included in systematic review, and, if applicable, included in the meta-analysis).                                                                                                                                                   | 3,4                |
| Data collection process            | 10 | Describe method of data extraction from reports (e.g., piloted forms, independently, in duplicate) and any processes for obtaining and confirming data from investigators.                                                                                                                                  | 4                  |
| Data items                         | 11 | List and define all variables for which data were sought (e.g., PICOS, funding sources) and any assumptions and simplifications made.                                                                                                                                                                       | 4                  |
| Risk of bias in individual studies | 12 | Describe methods used for assessing risk of bias of individual studies (including specification of whether this was done at the study or outcome level), and how this information is to be used in any data synthesis.                                                                                      | 4                  |
| Summary measures                   | 13 | State the principal summary measures (e.g., risk ratio, difference in means).                                                                                                                                                                                                                               | 4                  |
| Synthesis of results               | 14 | Describe the methods of handling data and combining results of studies, if done, including measures of consistency (e.g., $I^2$ ) for each meta-analysis.                                                                                                                                                   | 4                  |

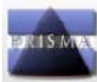

# PRISMA 2009 Checklist

1  
2  
3  
4  
5  
6  
7  
8  
9  
10  
11  
12  
13  
14  
15  
16  
17  
18  
19  
20  
21  
22  
23  
24  
25  
26  
27  
28  
29  
30  
31  
32  
33  
34  
35  
36  
37  
38  
39  
40  
41  
42  
43  
44  
45  
46  
47

| Section/topic                 | #  | Checklist item                                                                                                                                                                                           | Reported on page # |
|-------------------------------|----|----------------------------------------------------------------------------------------------------------------------------------------------------------------------------------------------------------|--------------------|
| Risk of bias across studies   | 15 | Specify any assessment of risk of bias that may affect the cumulative evidence (e.g., publication bias, selective reporting within studies).                                                             | 4                  |
| Additional analyses           | 16 | Describe methods of additional analyses (e.g., sensitivity or subgroup analyses, meta-regression), if done, indicating which were pre-specified.                                                         | 4                  |
| RESULTS                       |    |                                                                                                                                                                                                          |                    |
| Study selection               | 17 | Give numbers of studies screened, assessed for eligibility, and included in the review, with reasons for exclusions at each stage, ideally with a flow diagram.                                          |                    |
| Study characteristics         | 18 | For each study, present characteristics for which data were extracted (e.g., study size, PICOS, follow-up period) and provide the citations.                                                             |                    |
| Risk of bias within studies   | 19 | Present data on risk of bias of each study and, if available, any outcome level assessment (see item 12).                                                                                                |                    |
| Results of individual studies | 20 | For all outcomes considered (benefits or harms), present, for each study: (a) simple summary data for each intervention group (b) effect estimates and confidence intervals, ideally with a forest plot. |                    |
| Synthesis of results          | 21 | Present results of each meta-analysis done, including confidence intervals and measures of consistency.                                                                                                  |                    |
| Risk of bias across studies   | 22 | Present results of any assessment of risk of bias across studies (see Item 15).                                                                                                                          |                    |
| Additional analysis           | 23 | Give results of additional analyses, if done (e.g., sensitivity or subgroup analyses, meta-regression [see Item 16]).                                                                                    |                    |
| DISCUSSION                    |    |                                                                                                                                                                                                          |                    |
| Summary of evidence           | 24 | Summarize the main findings including the strength of evidence for each main outcome; consider their relevance to key groups (e.g., healthcare providers, users, and policy makers).                     |                    |
| Limitations                   | 25 | Discuss limitations at study and outcome level (e.g., risk of bias), and at review-level (e.g., incomplete retrieval of identified research, reporting bias).                                            |                    |
| Conclusions                   | 26 | Provide a general interpretation of the results in the context of other evidence, and implications for future research.                                                                                  |                    |
| FUNDING                       |    |                                                                                                                                                                                                          |                    |
| Funding                       | 27 | Describe sources of funding for the systematic review and other support (e.g., supply of data); role of funders for the systematic review.                                                               |                    |

From: Moher D, Liberati A, Tetzlaff J, Altman DG, The PRISMA Group (2009). Preferred Reporting Items for Systematic Reviews and Meta-Analyses: The PRISMA Statement. PLoS Med 6(7): e1000097. doi:10.1371/journal.pmed1000097

For more information, visit: [www.prisma-statement.org](http://www.prisma-statement.org).

# BMJ Open

## Does non-invasive ventilation change metabolic markers in children with obstructive sleep apnea? A Systematic Review and Meta-Analysis Study Protocol

|                                 |                                                                                                                                                                                                                                                                                                                                                                                                                                                                                                                                                                         |
|---------------------------------|-------------------------------------------------------------------------------------------------------------------------------------------------------------------------------------------------------------------------------------------------------------------------------------------------------------------------------------------------------------------------------------------------------------------------------------------------------------------------------------------------------------------------------------------------------------------------|
| Journal:                        | <i>BMJ Open</i>                                                                                                                                                                                                                                                                                                                                                                                                                                                                                                                                                         |
| Manuscript ID                   | bmjopen-2020-039655.R1                                                                                                                                                                                                                                                                                                                                                                                                                                                                                                                                                  |
| Article Type:                   | Protocol                                                                                                                                                                                                                                                                                                                                                                                                                                                                                                                                                                |
| Date Submitted by the Author:   | 26-Jun-2020                                                                                                                                                                                                                                                                                                                                                                                                                                                                                                                                                             |
| Complete List of Authors:       | Gerdung, Christopher; University of Alberta Faculty of Medicine and Dentistry, Pediatrics; Alberta Health Services, Pediatrics<br>Rodriguez-Lopez, Sara; University of Alberta, ;<br>Palkowski, Stefan; Stollery Children's Hospital; University of Alberta<br>Keto-Lambert, Diana; University of Alberta, Alberta Strategy for Patient-Oriented Research (SPOR) Knowledge Translation Platform<br>Sebastianski, Meghan; University of Alberta Faculty of Medicine and Dentistry Department of Pediatrics ,<br>Castro Codesal, Maria; University of Alberta, Pediatrics |
| <b>Primary Subject Heading</b>: | Paediatrics                                                                                                                                                                                                                                                                                                                                                                                                                                                                                                                                                             |
| Secondary Subject Heading:      | Respiratory medicine, Medical management, Evidence based practice                                                                                                                                                                                                                                                                                                                                                                                                                                                                                                       |
| Keywords:                       | Paediatric thoracic medicine < PAEDIATRICS, SLEEP MEDICINE, Paediatric endocrinology < PAEDIATRICS, Paediatric cardiology < PAEDIATRICS, Other metabolic, e.g. iron, porphyria < DIABETES & ENDOCRINOLOGY                                                                                                                                                                                                                                                                                                                                                               |
|                                 |                                                                                                                                                                                                                                                                                                                                                                                                                                                                                                                                                                         |

SCHOLARONE™  
Manuscripts



I, the Submitting Author has the right to grant and does grant on behalf of all authors of the Work (as defined in the below author licence), an exclusive licence and/or a non-exclusive licence for contributions from authors who are: i) UK Crown employees; ii) where BMJ has agreed a CC-BY licence shall apply, and/or iii) in accordance with the terms applicable for US Federal Government officers or employees acting as part of their official duties; on a worldwide, perpetual, irrevocable, royalty-free basis to BMJ Publishing Group Ltd ("BMJ") its licensees and where the relevant Journal is co-owned by BMJ to the co-owners of the Journal, to publish the Work in this journal and any other BMJ products and to exploit all rights, as set out in our [licence](#).

The Submitting Author accepts and understands that any supply made under these terms is made by BMJ to the Submitting Author unless you are acting as an employee on behalf of your employer or a postgraduate student of an affiliated institution which is paying any applicable article publishing charge ("APC") for Open Access articles. Where the Submitting Author wishes to make the Work available on an Open Access basis (and intends to pay the relevant APC), the terms of reuse of such Open Access shall be governed by a Creative Commons licence – details of these licences and which [Creative Commons](#) licence will apply to this Work are set out in our licence referred to above.

Other than as permitted in any relevant BMJ Author's Self Archiving Policies, I confirm this Work has not been accepted for publication elsewhere, is not being considered for publication elsewhere and does not duplicate material already published. I confirm all authors consent to publication of this Work and authorise the granting of this licence.

## Title

Does non-invasive ventilation change metabolic markers in children with obstructive sleep apnea? A Systematic Review and Meta-Analysis Study Protocol

## Authors:

Christopher A Gerdung<sup>1,2</sup>, Sara Rodriguez-Lopez<sup>1,2</sup>, Stefan Palkowski<sup>1,2</sup>, Diana Keto-Lambert<sup>3</sup>, Meghan Sebastianski<sup>3</sup>, Maria L Castro-Codesal<sup>1,2</sup>

## Affiliations:

1: Department of Pediatrics, University of Alberta, Edmonton, Alberta, Canada

2: Stollery Children's Hospital, Alberta Health Services, Edmonton, Alberta, Canada

3: Alberta Strategy for Patient-Oriented Research (SPOR) SUPPORT Unit Knowledge Translation Platform, University of Alberta, Edmonton, Alberta, Canada.

## Corresponding Contact Information

Dr. Maria Castro-Codesal  
4-590 Edmonton Clinic Health Academy  
11405-87 Avenue  
University of Alberta  
Edmonton, Alberta, Canada, T6G 1C9  
Tel: 780-248-5650  
Email: Castroco@ualberta.ca

## Abstract

### Introduction

Obstructive Sleep Apnea (OSA) is not only common within pediatrics but is associated with critical childhood metabolic morbidity such as obesity, cardiovascular disease and glucose tolerance impairment. Increasing evidence suggests an association between childhood OSA and metabolic syndrome such as markers of cardiovascular disease, systemic hypertension, glucose intolerance, and increased lipid profile. Recent studies have targeted changes in metabolic markers in children using NIV but no systematic reviews are available to summarize this emerging evidence. The purpose of this systematic review is to provide systematic synthesis of the evidence on the effect of NIV use on metabolic markers in children with OSA.

### Methods and Analysis:

A systematic search of electronic databases and grey literature will include pediatric interventional studies (RCTs, cohort studies) with and without a comparison group. Two reviewers will independently undertake the two step process of title/abstract and full text screening. Data will be extracted and assessed, with aggregate data being reported. When the data allow, meta-analysis will be performed.

Ethics and Dissemination:

There are no ethical concerns with this systematic review, as data has previously been published. This review will inform clinicians taking care of children with OSA and obesity/metabolic syndrome about the potential effects of NIV therapies on metabolic markers, and has the potential to change the approach to childhood OSA and obesity. Results of this systematic review will be submitted for dissemination in abstract and manuscript form.

Strengths and Limitations of this Study

- We will use comprehensive systematic review and meta-analysis methods to summarize the evidence on the efficacy of a respiratory intervention for an increasing health problem in children worldwide: obesity and metabolic syndrome.
- Methodological experts and pediatric clinical specialists have been consulted to ensure that our search strategy captures all potential metabolic markers that might be impacted by NIV.
- We will attempt a meta-analysis when there is enough homogeneity among populations and measured outcomes.
- Limited appraisal of the grey literature will be performed.

Introduction

Obstructive sleep apnea (OSA) is common in children with an estimated prevalence of 5.7% (1). OSA contributes to childhood morbidity, including impaired cognition, neurodevelopmental delay, cardio-metabolic dysfunction, and reduced quality of life (2). The metabolic consequences of OSA are well known among adult populations, with a clearly demonstrated association between OSA and metabolic syndrome, including systemic hypertension, cardiovascular risk, dyslipidemia, glucose control impairment and systemic inflammation (3, 4). The literature examining the association between metabolic syndrome in children has shown a similar relationship with an emerging body of the literature demonstrating a greater risk of hypertension, dyslipidemia and glucose control in obese children and youths with OSA (5-8).

The first line therapy for the treatment of OSA in children is adenotonsillectomy (2, 9). In both obese and non-obese children, surgical intervention can improve cardio-respiratory parameters in sleep studies including apnea hypopnea Index (AHI) and oxygen saturation values. Surgical management has also been shown to have positive effects on systemic inflammation and dyslipidemia (10-12). However, residual symptoms of OSA after adenotonsillectomy have been shown to be present in up to half of children, which is particularly true in children with obesity (13-15). Given the persistence of OSA after surgery, the metabolic consequences are likely to persist. Non-invasive ventilation, including continuous positive airway pressure (CPAP) and bilevel positive airway pressure (BPAP), is the recommended therapy for children with OSA who are not surgical candidates, or for children with persistent OSA post-surgery. Initiation of NIV has been shown to have significant effects on nocturnal symptoms of OSA and daytime outcomes such as daytime sleepiness, attention, academic performance, and quality of life (16-20). While previous systematic reviews and meta-analysis have summarized the impact of NIV in metabolic markers in the adult population, including hypertension cardiovascular outcomes, glucose control, lipid profile, systemic inflammation and even mortality (19, 21-29), similar systematic reviews

are not available in pediatric populations. The purpose of this systematic review is to provide a rigorous overview of the evidence describing the effect of NIV use on metabolic markers in children with OSA.

## Methods and Analysis

### Study design

The methodology of this systematic review and meta-analysis follows the recommendations made in the “Preferred Reporting Items for Systematic Reviews and Meta-Analyses protocols (PRISMA-P) 2015 statement” (30). Approval from the NIHR PROSPERO registry is pending.

### Search strategy

An information specialist, systematic review methodologist and clinical experts in pediatric respiratory and sleep medicine and pediatric metabolic syndrome have established a collaborative team to develop a comprehensive search strategy and determined the appropriate information sources. The search strategy includes terms for “NIV” used in a previously published scoping review (31, 32), a published filter for pediatric populations (31, 32) and addresses the following key concepts: effects on oxidative stress and markers of systemic inflammation, cardiovascular outcomes, changes in weight/body mass index, lipid profile, liver enzymes, glucose control and markers of insulin resistance, renal function and other metabolic markers (See Appendix A) (31). Information sources will include Ovid Medline, Ovid Embase, CINAHL via EbscoHOST, Wiley Cochrane Library (including the Cochrane Database of Systematic Reviews, the Cochrane Central Register of Controlled Trials, the Database of Abstracts of Reviews of Effects, the Health Technology Assessment Database, and the NHS Economic Evaluation Database) and PROQUEST Theses and Dissertations. No language restrictions will be applied to the search strategy. Letters, editorials, commentaries and non-intervention studies will be excluded. Reference lists of all studies included in this systematic review will be scanned to identify further relevant studies not detected by the search strategy. Published abstracts from 2018-2019 from the following conferences will be screened: American Thoracic Society Conference, Canadian Thoracic Society Conference, CHEST Congress, European Respiratory Society, Sleep Meeting (Appendix B). The search of the above information sources is planned to occur on April 30, 2020.

### Eligibility criteria

**Types of participants/population:** Studies including children (newborn to age 18 years) will be included. Studies across ages with disaggregated pediatric data will also be included. Eligible studies must pertain to children with OSA or other sleep-related breathing disorders as defined in the International Classification of Sleep Disorders, including obstructive sleep apnea and sleep-related hypoventilation

**Types of Interventions:** Included studies must contain information on NIV (CPAP or BPAP) use. We will include studies irrespective of the length of NIV usage.

**Type of Outcomes:** Eligible studies must include data related to metabolic markers, with no outcome restrictions. This includes but is not limited to: effects on oxidative stress and markers of systemic inflammation, cardiovascular outcomes, changes in weight/body mass index, lipid profile, liver enzymes, glucose control and markers of insulin resistance, renal function and other metabolic markers. Inflammatory markers, cardiovascular outcomes and other outcomes of metabolic syndrome are described in Appendix A.

**Types of Studies:** Interventional studies will be considered for inclusion including randomized and non-randomized clinical trials (RCTs and non-RCTs), controlled before-after studies. No other study designs will be considered for inclusion.

**Exclusion:** Qualitative and mixed methods research will be excluded, as will case series, case reports, and non-specified grey literature.

**Study records**

**Data management:** Records from searches will be imported into an EndNote library (Endnote X9, Clarivate Analytics) and duplicates will be removed. The library will be duplicated for independent screening.

**Selection process:** Two independent reviewers (MCC, CAG) will screen titles and abstracts of retrieved articles for eligibility based on the inclusion criteria. Full text will be retrieved for all potentially relevant articles, which will be reviewed independently by the two reviewers, and studies that meet the eligibility criteria will be included in the review. Discrepancies between the reviewers will be resolved through discussion. Reasons for exclusion will be recorded at the full-text review level.

**Data collection process:** Data extraction will be completed by one reviewer using a pre-designed standardized form and entered into RedCap Database (33, 34). Data extraction will be verified by a second reviewer for a sample of 20% of the studies with acceptance if agreement in at least 80% of the data. Duplicate data from the same data set published in different manuscripts will be removed. Data Extraction is expected to be complete by October 1, 2020.

**Data synthesis:** Once the information has been extracted, we will present findings including the numerical analysis of the number, publication type, publication year and country of publication of the studies included in the review. We will also present a narrative description of the study design, participant characteristics, sample size, NIV type, control group description, outcomes measures, and follow up duration. We will use this information to establish subcategories of studies which may include groupings based on age (i.e., infants, children, and adolescents), intervention type (i.e., CPAP, bi-level,) and outcomes (e.g. oxidative stress, obesity, dyslipidemia, liver disease, glucose intolerance, cardiovascular, renal and other metabolic diseases).

**Quality assessment and risk of bias:** Risk of bias will be assessed by two independent reviewers (MCC, CAG) specific to the study methodology. Tools will include the Quality Assessment Tool (35) and Cochrane risk of bias tool (36). Discrepancies in decisions will be resolved through discussion.

The reviewers will also use the Grading of Recommendations, Assessment, Development and Evaluations (GRADE) to assess the evidence at the outcome level (37). This will include assessing for risk of bias, imprecision, inconsistency, indirectness and publication bias.

**Meta-analysis**

Meta-analysis will be attempted for outcomes with enough homogeneity among the study populations. Homogeneity criteria will include an AHI <5 events/hour to define mild obstructive sleep apnea, 5-10 events/h for moderate and >10 for severe sleep disordered breathing as per the American Academy of Sleep Medicine (AASM) (38, 39). In addition, nocturnal hypoxemia will be defined by sleep time with oxygen saturations below 90% over 5% and nocturnal hypoventilation by over 25% sleep time carbon

dioxide levels above 50 mmHg (40). The information will be subcategorized to include grouping based on outcome (changes in the same metabolic marker). For non-randomized studies, we will combine effect estimates from studies adjusted by confounding rather than raw data if available. RCTs will be analyzed separately if available. Risk of bias will be considered and explanations for heterogeneity will be pursued including publication bias. Graphics of pooled data (i.e. forest plots) will be provided. Most outcome data are expected to be continuous. Heterogeneity in the pooled data will be minimized, by pooling data based on outcome, as well as the indication for NIV. In the event that pooled data remains heterogeneous within these pooled groups, a narrative description will be included. If the data allows, we will analyze the data with respect to NIV adherence and the length of time wearing NIV.

## Patient and Public Involvement

Patients and public were not involved in the design of this study. Dissemination of the information may include targeting patients and their care providers, as the results of the study may inform us of the effect of NIV on metabolic outcomes in children with sleep related breathing disorders.

## Ethics and Dissemination

There are no ethical concerns with this systematic review, as data has previously been published. This review will inform clinicians taking care of children with OSA and obesity/metabolic syndrome about the potential effects of NIV therapies on metabolic markers and help plan for necessary assessment of this group of children in the clinical practice. This information has the potential to change the approach to childhood OSA and obesity and therefore impact future clinical guidelines at national and international level. Results of this systematic review will be submitted for dissemination in abstract and manuscript form at multiple levels to target general pediatricians and pediatric specialists involved in the care of these patients including pediatric respiratory and sleep specialists, endocrinologists, cardiologists and nephrologists. The results of this systematic review will be of interest for general audience, which can be reached through infographics, videos and TED talks to be distributed through social media.

## Authors Contributions

MCC, CAG and SRL were involved in idea generation of this study. MCC, CAG, SRL, SP, DKL and MS were involved in study design and protocol development. MS and DKL developed the search strategies and performed literature reviews. MCC and CAG were involved with review of literature for inclusion into the study.

## Funding Statement

This work was supported by the Alberta Strategy for Patient-Oriented Research (SPOR) SUPPORT Unit Knowledge Translation Platform, which is funded by Alberta Innovates and the Canadian Institutes of Health Research.

## Competing Interests Statement

There are no competing interests to declare.

1  
2  
3  
4  
5  
6  
7  
8  
9  
10  
11  
12  
13  
14  
15  
16  
17  
18  
19  
20  
21  
22  
23  
24  
25  
26  
27  
28  
29  
30  
31  
32  
33  
34  
35  
36  
37  
38  
39  
40  
41  
42  
43  
44  
45  
46  
47  
48  
49  
50  
51  
52  
53  
54  
55  
56  
57  
58  
59  
60

Word Count: (4000 max)

For peer review only

## References:

1. Marcus CL, Brooks LJ, Draper KA, Gozal D, Halbower AC, Jones J, et al. Diagnosis and management of childhood obstructive sleep apnea syndrome. *Pediatrics*. 2012;130(3):e714-55.
2. Marcus CL, Moore RH, Rosen CL, Giordani B, Garetz SL, Taylor HG, et al. A randomized trial of adenotonsillectomy for childhood sleep apnea. *N Engl J Med*. 2013;368(25):2366-76.
3. Kong DL, Qin Z, Wang W, Pan Y, Kang J, Pang J. Association between obstructive sleep apnea and metabolic syndrome: a meta-analysis. *Clin Invest Med*. 2016;39(5):E161-E72.
4. Xu S, Wan Y, Xu M, Ming J, Xing Y, An F, et al. The association between obstructive sleep apnea and metabolic syndrome: a systematic review and meta-analysis. *BMC Pulmonary Medicine*. 2015;15:105.
5. Patinkin ZW, Feinn R, Santos M. Metabolic Consequences of Obstructive Sleep Apnea in Adolescents with Obesity: A Systematic Literature Review and Meta-Analysis. *Child Obes*. 2017;13(2):102-10.
6. Koren D, Gozal D, Philby MF, Bhattacharjee R, Kheirandish-Gozal L. Impact of obstructive sleep apnoea on insulin resistance in nonobese and obese children. *Eur Respir J*. 2016;47(4):1152-61.
7. Redline S, Storfer-Isser A, Rosen CL, Johnson NL, Kirchner HL, Emancipator J, et al. Association between metabolic syndrome and sleep-disordered breathing in adolescents. *Am J Respir Crit Care Med*. 2007;176(4):401-8.
8. Verhulst SL, Schrauwen N, Haentjens D, Rooman RP, Van Gaal L, De Backer WA, et al. Sleep-disordered breathing and the metabolic syndrome in overweight and obese children and adolescents. *J Pediatr*. 2007;150(6):608-12.
9. Alsubie HS, BaHammam AS. Obstructive Sleep Apnoea: Children are not little Adults. *Paediatr Respir Rev*. 2017;21:72-9.
10. Kheirandish-Gozal L, Gileles-Hillel A, Alonso-Alvarez ML, Peris E, Bhattacharjee R, Teran-Santos J, et al. Effects of adenotonsillectomy on plasma inflammatory biomarkers in obese children with obstructive sleep apnea: A community-based study. *Int J Obes (Lond)*. 2015;39(7):1094-100.
11. Gozal D, Capdevila OS, Kheirandish-Gozal L. Metabolic alterations and systemic inflammation in obstructive sleep apnea among nonobese and obese prepubertal children. *Am J Respir Crit Care Med*. 2008;177(10):1142-9.
12. Waters KA, Sitha S, O'Brien L M, Bibby S, de Torres C, Vella S, et al. Follow-up on metabolic markers in children treated for obstructive sleep apnea. *Am J Respir Crit Care Med*. 2006;174(4):455-60.
13. Scheffler P, Wolter NE, Narang I, Amin R, Holler T, Ishman SL, et al. Surgery for Obstructive Sleep Apnea in Obese Children: Literature Review and Meta-analysis. *Otolaryngol Head Neck Surg*. 2019;160(6):985-92.
14. Kang KT, Koltai PJ, Lee CH, Lin MT, Hsu WC. Lingual Tonsillectomy for Treatment of Pediatric Obstructive Sleep Apnea: A Meta-analysis. *JAMA Otolaryngol Head Neck Surg*. 2017;143(6):561-8.
15. Rivero A, Durr M. Lingual Tonsillectomy for Pediatric Persistent Obstructive Sleep Apnea: A Systematic Review and Meta-analysis. *Otolaryngol Head Neck Surg*. 2017;157(6):940-7.
16. Beebe DW, Byars KC. Adolescents with obstructive sleep apnea adhere poorly to positive airway pressure (PAP), but PAP users show improved attention and school performance. *PLoS ONE*. 2011;6(3):e16924.
17. Marcus CL, Rosen G, Ward SL, Halbower AC, Sterni L, Lutz J, et al. Adherence to and effectiveness of positive airway pressure therapy in children with obstructive sleep apnea. *Pediatrics*. 2006;117(3):e442-51.

18. Marcus CL, Radcliffe J, Konstantinopoulou S, Beck SE, Cornaglia MA, Traylor J, et al. Effects of positive airway pressure therapy on neurobehavioral outcomes in children with obstructive sleep apnea. *American Journal of Respiratory & Critical Care Medicine*. 2012;185(9):998-1003.

19. Patil SP, Ayappa IA, Caples SM, Kimoff RJ, Patel SR, Harrod CG. Treatment of Adult Obstructive Sleep Apnea With Positive Airway Pressure: An American Academy of Sleep Medicine Systematic Review, Meta-Analysis, and GRADE Assessment. *J Clin Sleep Med*. 2019;15(2):301-34.

20. Uong EC, Epperson M, Bathon SA, Jeffe DB. Adherence to nasal positive airway pressure therapy among school-aged children and adolescents with obstructive sleep apnea syndrome. *Pediatrics*. 2007;120(5):e1203-11.

21. Martinez-Garcia MA, Campos-Rodriguez F, Javaheri S, Gozal D. Pro: continuous positive airway pressure and cardiovascular prevention. *European Respiratory Journal*. 2018;51(5):05.

22. Masa JF, Corral-Penafiel J. Should use of 4 hours continuous positive airway pressure per night be considered acceptable compliance? *Eur Respir J*. 2014;44(5):1119-20.

23. Weaver TE, Maislin G, Dinges DF, Bloxham T, George CF, Greenberg H, et al. Relationship between hours of CPAP use and achieving normal levels of sleepiness and daily functioning. *Sleep*. 2007;30(6):711-9.

24. Wolf J, Narkiewicz K. Optimizing the Management of Uncontrolled/Resistant Hypertension. The Importance of Sleep Apnoea Syndrome. *Curr Vasc Pharmacol*. 2017;16(1):44-53.

25. Lei Q, Lv Y, Li K, Ma L, Du G, Xiang Y, et al. Effects of continuous positive airway pressure on blood pressure in patients with resistant hypertension and obstructive sleep apnea: a systematic review and meta-analysis of six randomized controlled trials. *J Bras Pneumol*. 2017;43(5):373-9.

26. Zhu B, Ma C, Chaiard J, Shi C. Effect of continuous positive airway pressure on glucose metabolism in adults with type 2 diabetes: a systematic review and meta-analysis of randomized controlled trials. *Sleep & Breathing*. 2018;22(2):287-95.

27. McEvoy RD, Kohler M. Con: continuous positive airway pressure and cardiovascular prevention. *European Respiratory Journal*. 2018;51(5):05.

28. Lee CP, Kushida CA, Abisheganaden JA. Epidemiological and pathophysiological evidence supporting links between obstructive sleep apnoea and Type 2 diabetes mellitus. *Singapore Medical Journal*. 2019;60(2):54-6.

29. Labarca G, Reyes T, Jorquera J, Dreyse J, Drake L. CPAP in patients with obstructive sleep apnea and type 2 diabetes mellitus: Systematic review and meta-analysis. *Clin Respir J*. 2018;12(8):2361-8.

30. Moher D, Shamseer L, Clarke M, Ghersi D, Liberati A, Petticrew M, et al. Preferred reporting items for systematic review and meta-analysis protocols (PRISMA-P) 2015 statement. *Syst Rev*. 2015;4:1.

31. Castro Codesal ML, Featherstone R, Martinez Carrasco C, Katz SL, Chan EY, Bendiak GN, et al. Long-term non-invasive ventilation therapies in children: a scoping review protocol. *BMJ Open*. 2015;5(8):e008697.

32. Castro-Codesal ML, Dehaan K, Bedi PK, Bendiak GN, Schmalz L, Katz SL, et al. Longitudinal changes in clinical characteristics and outcomes for children using long-term non-invasive ventilation. *PLoS ONE*. 2018;13(1).

33. Harris PA, Taylor R, Minor BL, Elliott V, Fernandez M, O'Neal L, et al. The REDCap consortium: Building an international community of software platform partners. *J Biomed Inform*. 2019;95:103208.

34. Harris PA, Taylor R, Thielke R, Payne J, Gonzalez N, Conde JG. Research electronic data capture (REDCap)--a metadata-driven methodology and workflow process for providing translational research informatics support. *J Biomed Inform*. 2009;42(2):377-81.

35. Thomas H. Quality assessment tool for unaitative studies. Effective Public Health Practicde Project. 2003 [Available from: <https://www.ehpdp.ca/quality-assessment-tool-for-quantitative-studies/>].

36. Higgins JPT, Altman DG, Gøtzsche PC, Jüni P, Moher D, Oxman AD, et al. The Cochrane Collaboration's tool for assessing risk of bias in randomised trials. *Bmj*. 2011;343:d5928.

- 1  
2  
3 37. Guyatt G, Oxman AD, Akl EA, Kunz R, Vist G, Brozek J, et al. GRADE guidelines: 1. Introduction-  
4 GRADE evidence profiles and summary of findings tables. *J Clin Epidemiol*. 2011;64(4):383-94.  
5 38. Dehlink E, Tan HL. Update on paediatric obstructive sleep apnoea. *J Thorac Dis*. 2016;8(2):224-  
6 35.  
7 39. DeHaan KL, Seton C, Fitzgerald DA, Waters KA, MacLean JE. Polysomnography for the diagnosis  
8 of sleep disordered breathing in children under 2 years of age. *Pediatr Pulmonol*. 2015;50(12):1346-53.  
9 40. Berry RB, Albertario CL, M HS. The AASM Manual for the Scoring of Sleep and Associated Events:  
10 Rules, terminology and Technical Specifications. Version 2.5. Darien, IL: American Academy of Sleep  
11 Medicine; 2018.  
12  
13  
14  
15  
16  
17  
18  
19  
20  
21  
22  
23  
24  
25  
26  
27  
28  
29  
30  
31  
32  
33  
34  
35  
36  
37  
38  
39  
40  
41  
42  
43  
44  
45  
46  
47  
48  
49  
50  
51  
52  
53  
54  
55  
56  
57  
58  
59  
60

Supplemental Material

Appendix A (Search Strategies)

NIV

As per (31, 41)

Children

As per (31, 41)

SDB

Sleep Apnea, Obstructive Sleep Apnea, OSA, Central Sleep Apnea, CSA, Primary Central Sleep Apnea, Primary Sleep Apnea of Infancy, Primary Central Sleep Apnea of Prematurity, Treatment-Emergent Central Sleep Apnea, Obesity Hypoventilation Syndrome, Hypoventilation, Central Hypoventilation, Pickwickian Syndrome, Congenital Central Hypoventilation Syndrome, CCHS, Congenital Central Alveolar Hypoventilation Syndrome, Late onset Central Hypoventilation with Hypothalamic Dysfunction, Idiopathic Central Alveolar Hypoventilation, Central Alveolar Hypoventilation, Central Hypoventilation, Sleep related hypoventilation, Sleep related hypoxemia, Snoring, Primary Snoring, Catathrenia

Metabolic Markers

*Oxidative stress:* Oxidative Stress, inflammation, metabolism, metabolic, CRP, interleukin-6 (IL-6) and 8 (IL), tumor necrosis factor alpha (TNFa), cytokines, adipokines, cortisol, a-amylase, sympathetic dysfunction, endothelial dysfunction, atherosclerosis, arterial stiffness, endothelial nitric oxide synthase (eNOS), nitric oxide (NO), cyclooxygenase (Cox)-1, Cox-2, thromboxane A2, prostacyclin. Circulating progenitor cells (CPCs), 8-isoprostanes, circulating cell-derived MPS: PMPs, LMPs, EMPs, adiponectin, LTB4, TNFR-1, IFN, plasminogen activator inhibitor-1, monocyte chemoattractant protein-1, matrix metalloproteinase-9, apelin C, osteocrin, adropin, TREM-1, pentraxin 3, BNP, MRP 8/14

*Obesity:* weight, weight gain, weight loss, weight management, obese, obesity, overweight, body mass index, BMI, growth, growth acceleration, anthropometric, leptin, grehlin, Dyslipidemia: Dislipidemia, lipid, elevated lipid, Triglycerides, cholesterol, Total cholesterol, high-density lipoprotein cholesterol, HDL-C, HDL, apoB, lipoprotein

*Liver disease:* liver enzymes, Aspartate transaminase, AST, alanine transaminase, ALT, liver disease, nonalcoholic fatty liver disease, NAFLD

Glucose intolerance: glucose, elevated glucose, glucose metabolism, glycemia, hyperglycemia, insulin, elevated insulin, insulin resistance, diabetes, diabetes mellitus, adiponectin, adiposity, HOMA-index (homeostasis model assessment), HbA1c, fasting plasma glucose (FPG), fasting serum glucose, fasting glucose, fasting plasma insulin (FPI), OGTT, oral glucose tolerance test, glucose tolerance test, acute insulin response to glucose, acute insulin response (FSIGT), C-peptide, glucagon

*Cardiovascular:* heart function, cardiovascular disease, cardiovascular diseases, Blood pressure, systolic blood pressure (SBP), diastolic blood pressure (DBP), hypertension, hypertensive, high blood pressure, High blood pressures, elevated blood pressure, elevated blood pressures, prehypertension, 24-hour ambulatory blood pressure monitoring (ABPM), nocturnal blood pressure dipping, nocturnal dipping, blood pressure variability, nocturnal blood pressure variability, Left ventricular hypertrophy, LVH, right ventricular hypertrophy, RVH, ventricular

hypertrophy, echocardiogram, systolic function impairment, diastolic function impairment, cardiac events, cardiac event, cardiac events, cardiac, heart, hearts, coronary disease, coronary diseases, sudden cardiac death, sudden cardiac deaths, cardiac sudden death, sudden cardiac deaths, sudden cardiac arrest, sudden cardiac arrests, cardiac arrest, cardiac arrests, heart failure, right heart failure, acute right heart failure, chronic right heart failure,

*Renal involvement:* Proteinuria, Microalbuminuria, Focal segmental glomerulosclerosis (FSGS), kidney, renal

*Other:* Metabolic disease

## Appendix B: Published Abstracts from Prominent Conferences and Thesis Dissertations

American Thoracic Society

Canadian Respiratory Conference

CHEST

European Respiratory Society International Congress

Sleep Meeting

World Sleep Congress

Thesisdissertations.org

1  
2  
3  
4  
5  
6  
7  
8  
9  
10  
11  
12  
13  
14  
15  
16  
17  
18  
19  
20  
21  
22  
23  
24  
25  
26  
27  
28  
29  
30  
31  
32  
33  
34  
35  
36  
37  
38  
39  
40  
41  
42  
43  
44  
45  
46

**PRISMA-P (Preferred Reporting Items for Systematic review and Meta-Analysis Protocols) 2015 checklist: recommended items to address in a systematic review protocol\***

| Section and topic          | Item No | Checklist item                                                                                                                                                                                                                | Page   |
|----------------------------|---------|-------------------------------------------------------------------------------------------------------------------------------------------------------------------------------------------------------------------------------|--------|
| ADMINISTRATIVE INFORMATION |         |                                                                                                                                                                                                                               |        |
| Title:                     |         |                                                                                                                                                                                                                               |        |
| Identification             | 1a      | Identify the report as a protocol of a systematic review                                                                                                                                                                      | Page 1 |
| Update                     | 1b      | If the protocol is for an update of a previous systematic review, identify as such                                                                                                                                            |        |
| Registration               | 2       | If registered, provide the name of the registry (such as PROSPERO) and registration number                                                                                                                                    | Page 2 |
| Authors:                   |         |                                                                                                                                                                                                                               |        |
| Contact                    | 3a      | Provide name, institutional affiliation, e-mail address of all protocol authors; provide physical mailing address of corresponding author                                                                                     | Page 1 |
| Contributions              | 3b      | Describe contributions of protocol authors and identify the guarantor of the review                                                                                                                                           | Page 5 |
| Amendments                 | 4       | If the protocol represents an amendment of a previously completed or published protocol, identify as such and list changes; otherwise, state plan for documenting important protocol amendments                               | N/A    |
| Support:                   |         |                                                                                                                                                                                                                               |        |
| Sources                    | 5a      | Indicate sources of financial or other support for the review                                                                                                                                                                 | Page 5 |
| Sponsor                    | 5b      | Provide name for the review funder and/or sponsor                                                                                                                                                                             |        |
| Role of sponsor or funder  | 5c      | Describe roles of funder(s), sponsor(s), and/or institution(s), if any, in developing the protocol                                                                                                                            |        |
| INTRODUCTION               |         |                                                                                                                                                                                                                               |        |
| Rationale                  | 6       | Describe the rationale for the review in the context of what is already known                                                                                                                                                 | Page 2 |
| Objectives                 | 7       | Provide an explicit statement of the question(s) the review will address with reference to participants, interventions, comparators, and outcomes (PICO)                                                                      | Page 2 |
| METHODS                    |         |                                                                                                                                                                                                                               |        |
| Eligibility criteria       | 8       | Specify the study characteristics (such as PICO, study design, setting, time frame) and report characteristics (such as years considered, language, publication status) to be used as criteria for eligibility for the review | Page 3 |
| Information sources        | 9       | Describe all intended information sources (such as electronic databases, contact with study authors, trial registers or other grey literature sources) with planned dates of coverage                                         | Page 3 |
| Search strategy            | 10      | Present draft of search strategy to be used for at least one electronic database, including planned limits, such that it could be repeated                                                                                    | Page 3 |
| Study records:             |         |                                                                                                                                                                                                                               |        |
| Data management            | 11a     | Describe the mechanism(s) that will be used to manage records and data throughout the review                                                                                                                                  | Page 4 |

|                                    |     |                                                                                                                                                                                                                                                  |        |
|------------------------------------|-----|--------------------------------------------------------------------------------------------------------------------------------------------------------------------------------------------------------------------------------------------------|--------|
| Selection process                  | 11b | State the process that will be used for selecting studies (such as two independent reviewers) through each phase of the review (that is, screening, eligibility and inclusion in meta-analysis)                                                  | Page 4 |
| Data collection process            | 11c | Describe planned method of extracting data from reports (such as piloting forms, done independently, in duplicate), any processes for obtaining and confirming data from investigators                                                           | Page 4 |
| Data items                         | 12  | List and define all variables for which data will be sought (such as PICO items, funding sources), any pre-planned data assumptions and simplifications                                                                                          | Page 4 |
| Outcomes and prioritization        | 13  | List and define all outcomes for which data will be sought, including prioritization of main and additional outcomes, with rationale                                                                                                             | Page 4 |
| Risk of bias in individual studies | 14  | Describe anticipated methods for assessing risk of bias of individual studies, including whether this will be done at the outcome or study level, or both; state how this information will be used in data synthesis                             | Page 4 |
| Data synthesis                     | 15a | Describe criteria under which study data will be quantitatively synthesised                                                                                                                                                                      | Page 4 |
|                                    | 15b | If data are appropriate for quantitative synthesis, describe planned summary measures, methods of handling data and methods of combining data from studies, including any planned exploration of consistency (such as $I^2$ , Kendall's $\tau$ ) | Page 4 |
|                                    | 15c | Describe any proposed additional analyses (such as sensitivity or subgroup analyses, meta-regression)                                                                                                                                            | Page 4 |
|                                    | 15d | If quantitative synthesis is not appropriate, describe the type of summary planned                                                                                                                                                               | N/A    |
| Meta-bias(es)                      | 16  | Specify any planned assessment of meta-bias(es) (such as publication bias across studies, selective reporting within studies)                                                                                                                    | Page 4 |
| Confidence in cumulative evidence  | 17  | Describe how the strength of the body of evidence will be assessed (such as GRADE)                                                                                                                                                               | Page 4 |

**\* It is strongly recommended that this checklist be read in conjunction with the PRISMA-P Explanation and Elaboration (cite when available) for important clarification on the items. Amendments to a review protocol should be tracked and dated. The copyright for PRISMA-P (including checklist) is held by the PRISMA-P Group and is distributed under a Creative Commons Attribution Licence 4.0.**

*From: Shamseer L, Moher D, Clarke M, Ghersi D, Liberati A, Petticrew M, Shekelle P, Stewart L, PRISMA-P Group. Preferred reporting items for systematic review and meta-analysis protocols (PRISMA-P) 2015: elaboration and explanation. BMJ. 2015 Jan 2;349(jan02 1):g7647.*
