# Supplementary material for: Does non-invasive ventilation change metabolic markers in children with obstructive sleep apnoea? A systematic review and meta-analysis study protocol
Source: PubMed Central journal article supplement — BMJ Open. 2020 Aug 23;10(8):e039655. doi: 10.1136/bmjopen-2020-039655 (PMC7445331; doi:10.1136/bmjopen-2020-039655), 2020-08-23
Supplement: bmjopen-2020-039655supp001.pdf [file bmjopen-2020-039655supp001.pdf]

## Supplemental Material

### Appendix A (Search Strategies)

#### NIV

As per (31, 41)

#### Children

As per (31, 41)

#### SDB

Sleep Apnea, Obstructive Sleep Apnea, OSA, Central Sleep Apnea, CSA, Primary Central Sleep Apnea, Primary Sleep Apnea of Infancy, Primary Central Sleep Apnea of Prematurity, Treatment-Emergent Central Sleep Apnea, Obesity Hypoventilation Syndrome, Hypoventilation, Central Hypoventilation, Pickwickian Syndrome, Congenital Central Hypoventilation Syndrome, CCHS, Congenital Central Alveolar Hypoventilation Syndrome, Late onset Central Hypoventilation with Hypothalamic Dysfunction, Idiopathic Central Alveolar Hypoventilation, Central Alveolar Hypoventilation, Central Hypoventilation, Sleep related hypoventilation, Sleep related hypoxemia, Snoring, Primary Snoring, Catathrenia

#### Metabolic Markers

*Oxidative stress*: Oxidative Stress, inflammation, metabolism, metabolic, CRP, interleukin-6 (IL-6) and 8 (IL), tumor necrosis factor alpha (TNF $\alpha$ ), cytokines, adipokines, cortisol,  $\alpha$ -amylase, sympathetic dysfunction, endothelial dysfunction, atherosclerosis, arterial stiffness, endothelial nitric oxide synthase (eNOS), nitric oxide (NO), cyclooxygenase (Cox)-1, Cox-2, thromboxane A2, prostacyclin. Circulating progenitor cells (CPCs), 8-isoprostanes, circulating cell-derived MPS: PMPs, LMPs, EMPs, adiponectin, LTB4, TNFR-1, IFN, plasminogen activator inhibitor-1, monocyte chemoattractant protein-1, matrix metalloproteinase-9, apelin C, osteocrin, adropin, TREM-1, pentraxin 3, BNP, MRP 8/14

*Obesity*: weight, weight gain, weight loss, weight management, obese, obesity, overweight, body mass index, BMI, growth, growth acceleration, anthropometric, leptin, grehlin, Dyslipidemia: Dislipidemia, lipid, elevated lipid, Triglycerides, cholesterol, Total cholesterol, high-density lipoprotein cholesterol, HDL-C, HDL, apoB, lipoprotein

*Liver disease*: liver enzymes, Aspartate transaminase, AST, alanine transaminase, ALT, liver disease, nonalcoholic fatty liver disease, NAFLD

Glucose intolerance: glucose, elevated glucose, glucose metabolism, glycemia, hyperglycemia, insulin, elevated insulin, insulin resistance, diabetes, diabetes mellitus, adiponectin, adiposity, HOMA-index (homeostasis model assessment), HbA1c, fasting plasma glucose (FPG), fasting serum glucose, fasting glucose, fasting plasma insulin (FPI), OGTT, oral glucose tolerance test, glucose tolerance test, acute insulin response to glucose, acute insulin response (FSIGT), C-peptide, glucagon

*Cardiovascular*: heart function, cardiovascular disease, cardiovascular diseases, Blood pressure, systolic blood pressure (SBP), diastolic blood pressure (DBP), hypertension, hypertensive, high blood pressure, High blood pressures, elevated blood pressure, elevated blood pressures, prehypertension, 24-hour ambulatory blood pressure monitoring (ABPM), nocturnal blood pressure dipping, nocturnal dipping, blood pressure variability, nocturnal blood pressure variability, Left ventricular hypertrophy, LVH, right ventricular hypertrophy, RVH, ventricular

hypertrophy, echocardiogram, systolic function impairment, diastolic function impairment, cardiac events, cardiac event, cardiac events, cardiac, heart, hearts, coronary disease, coronary diseases, sudden cardiac death, sudden cardiac deaths, cardiac sudden death, sudden cardiac deaths, sudden cardiac arrest, sudden cardiac arrests, cardiac arrest, cardiac arrests, heart failure, right heart failure, acute right heart failure, chronic right heart failure,  
*Renal involvement:* Proteinuria, Microalbuminuria, Focal segmental glomerulosclerosis (FSGS), kidney, renal  
*Other:* Metabolic disease

#### Appendix B: Published Abstracts from Prominent Conferences and Thesis Dissertations

American Thoracic Society

Canadian Respiratory Conference

CHEST

European Respiratory Society International Congress

Sleep Meeting

World Sleep Congress

Thesisdissertations.org
